# Supplementary material for: Homotypic and heterotypic immune responses to Omicron variant in immunocompromised patients in diverse clinical settings
Source: PubMed Central journal article supplement (PMC9352686; doi:10.1038/s41467-022-32235-x), 2022-08-04

## SUPPLEMENTARY INFORMATION

**Supplementary Table 1** - Comparison of baseline characteristics of transplant patient cohorts. IQR: Interquartile range, SD: Standard deviation. Cohort 1 includes transplant recipients with COVID-19 before the Omicron wave; Cohort 2 includes transplant recipients with BA.1 infection; Cohort 3 includes uninfected transplant recipients with 3 doses of mRNA-1273 (Moderna) vaccine; † Years from transplant to infection in case of cohort 1 and 2, and from transplant to last dose of the vaccine in case of cohort 3. ¥ Continuous variables p-value estimated using two-sided Mann Whitney U-test (Wilcoxon rank-sum). Categorical variables p-value estimated using two-sided Fisher's exact test.

| Characteristics                                                         | Cohort 1<br>(N=91) | Cohort 2<br>(N=75) | Cohort 3<br>(N=60) | p value¥ |
|-------------------------------------------------------------------------|--------------------|--------------------|--------------------|----------|
| Age – years (mean±SD)                                                   | 54.2±14.1          | 53.5±12.7          | 67.7±4.8           | <0.001   |
| Female sex – no. (%)                                                    | 23 (25%)           | 26 (35%)           | 23 (38%)           | 0.19     |
| Type of transplant – no. (%)                                            |                    |                    |                    |          |
| Kidney or KP                                                            | 52 (57.1%)         | 39 (52%)           | 35 (58.3%)         | 0.72     |
| Lung                                                                    | 16 (17.6%)         | 16 (21.3%)         | 11 (18.3%)         | 0.83     |
| Liver                                                                   | 19 (20.9%)         | 11 (14.7%)         | 3 (5%)             | 0.019    |
| Heart                                                                   | 3 (3.3%)           | 6 (8%)             | 10 (16.7%)         | 0.017    |
| Kidney-liver                                                            | 1 (1.1%)           | 3 (4%)             | 1 (1.67%)          | 0.53     |
| Years since transplant<br>(median, IQR)†                                | 5.4 (2.3-9.1)      | 5.9 (2.3-9.9)      | 3.8 (2.0-6.7)      | 0.29     |
| Immunosuppressant – no. (%)                                             |                    |                    |                    |          |
| Prednisone                                                              | 73 (80.2%)         | 64 (85.3%)         | 50 (83.3%)         | 0.68     |
| Calcineurin-inhibitor<br>(Tacrolimus or cyclosporine)                   | 84 (92.3%)         | 73 (97.3%)         | 59 (98.3%)         | 0.17     |
| Anti-metabolite<br>(Mycophenolate or azathioprine)                      | 74 (81.3%)         | 64 (85.3%)         | 51 (85%)           | 0.79     |
| Antilymphocyte globulin in the<br>previous 3 months                     | 4 (4.4%)           | 1 (1.3%)           | 0 (0%)             | 0.22     |
| Acute rejection in the<br>previous 3 months                             | 2 (2.2%)           | 0                  | 1(1.7%)            | 0.49     |
| B-cell depleting<br>antibody in the<br>previous 3 months<br>(rituximab) | 0                  | 0                  | 0                  | 1.00     |

**Supplementary Table 2** – Comparison of baseline characteristics of SOTR with and without T-cell testing in Cohort 1. IQR: Interquartile range. SD: Standard deviation. SOTR:solid organ transplant recipients. † Years from transplant to infection. ¥ Continuous variables p-value estimated using a two-sided Mann Whitney U-test (Wilcoxon rank-sum). Categorical variables p-value estimated using two-sided Fisher’s exact test.

| Characteristics (Cohort 1)                                     | T-cell analysis (N=25) | No T-cell analysis (N=66) | p value¥ |
|----------------------------------------------------------------|------------------------|---------------------------|----------|
| Age – years (mean±SD)                                          | 55 ± 14.1              | 53.8 ± 14.2               | 0.72     |
| Female sex – no. (%)                                           | 7 (28%)                | 16 (24%)                  | 0.79     |
| Type of transplant – no. (%)                                   |                        |                           |          |
| Kidney or KP                                                   | 15 (60%)               | 37 (56%)                  | 0.81     |
| Lung                                                           | 5 (20%)                | 11 (17%)                  | 0.76     |
| Liver                                                          | 5 (20%)                | 14 (21%)                  | 1.00     |
| Heart                                                          | 0 (0%)                 | 3 (5%)                    | 0.56     |
| Kidney-liver                                                   | 0 (0%)                 | 1 (2%)                    | 1.00     |
| Years since transplant (median, IQR)†                          | 3.7 (1.8-6.6)          | 5.7 (2.9-9.4)             | 0.14     |
| Immunosuppressant – no. (%)                                    |                        |                           |          |
| Prednisone                                                     | 20 (80%)               | 53 (80%)                  | 1.00     |
| Calcineurin-inhibitor (Tacrolimus or cyclosporine)             | 24 (96%)               | 60 (91%)                  | 0.67     |
| Anti-metabolite (Mycophenolate or azathioprine)                | 22 (33%)               | 52 (79%)                  | 0.38     |
| Sirolimus                                                      | 0 (0%)                 | 1 (2%)                    | 1.00     |
| Antilymphocyte globulin in the previous 3 months               | 0 (0%)                 | 4 (6%)                    | 0.57     |
| Acute rejection in the previous 3 months                       | 0 (0%)                 | 2 (3%)                    | 1.00     |
| B-cell depleting antibody in the previous 3 months (rituximab) | 0 (0%)                 | 0 (0%)                    | 1.00     |

**Supplementary Table 3** - Polyfunctional CD4<sup>+</sup> T-cell responses by baseline characteristics in Cohort 2. Proportions of low (<100 per 10<sup>6</sup>), medium (100-1000 per 10<sup>6</sup>), and high (>1000 per 10<sup>6</sup>) BA.1-specific polyfunctional CD4<sup>+</sup> T-cell frequencies are shown by baseline demographics. Continuous variables p-value estimated using two-sided Mann Whitney U-test (Wilcoxon rank-sum). Categorical variables p-value estimated using two-sided Fisher's exact test.

| <b>Characteristics</b>                              | <b>Low<br/>(N=5)</b> | <b>Medium<br/>(N=32)</b> | <b>High<br/>(N=27)</b> | <b>P-value</b> |
|-----------------------------------------------------|----------------------|--------------------------|------------------------|----------------|
| Age – years (mean±SD)                               | 44.9±11.6            | 53.8±12.0                | 52.9±12.9              | 0.34           |
| Female sex – n (%)                                  | 4(80%)               | 9 (28%)                  | 8 (30%)                | 0.082          |
| Type of transplant – n (%)                          |                      |                          |                        |                |
| Kidney                                              | 1 (20%)              | 12 (38%)                 | 12 (44%)               | 0.64           |
| Lung                                                | 3 (60%)              | 6 (19%)                  | 4 (15%)                | 0.088          |
| Liver                                               | 0 (0%)               | 4 (13%)                  | 6 (22%)                | 0.49           |
| Heart                                               | 1(20%)               | 2 (6%)                   | 2 (7%)                 | 0.45           |
| Kidney-pancreas                                     | 0 (0%)               | 6 (19%)                  | 3 (11%)                | 0.54           |
| Kidney-liver                                        | 0 (0%)               | 2(6%)                    | 0 (0%)                 | 0.57           |
| Years since transplant<br>(mean (SD))               | 6.2 (2.9)            | 8.9 (9.0)                | 7.1 (7.8)              | 0.62           |
| Immunosuppressant – n (%)                           |                      |                          |                        |                |
| Prednisone                                          | 5 (100%)             | 28 (88%)                 | 22 (81%)               | 0.65           |
| Calcineurin Inhibitor                               | 5 (100%)             | 31(97%)                  | 27 (100%)              | 1.00           |
| Anti-metabolite                                     | 3 (60%)              | 27 (84%)                 | 24 (89%)               | 0.22           |
| Anti-lymphocyte<br>globulin in the last 3<br>months | 0 (0%)               | 0 (0%)                   | 1 (4%)                 | 0.50           |
| No. of COVID-19 vaccines – n (%)                    |                      |                          |                        |                |
| 0                                                   | 0 (0%)               | 0 (0%)                   | 2 (7%)                 | 0.69           |
| 1                                                   | 0 (0%)               | 0 (0%)                   | 1 (4%)                 |                |
| 2                                                   | 1 (20%)              | 4 (13%)                  | 5 (19%)                |                |
| 3                                                   | 4 (80%)              | 25 (78%)                 | 17 (63%)               |                |
| 4                                                   | 0 (0%)               | 3 (9%)                   | 2 (7%)                 |                |

**Supplementary Table 4** - Polyfunctional CD8<sup>+</sup> T-cell responses by baseline characteristics in Cohort 2. Negative denotes <100 per 10<sup>6</sup> positive cells, and positive denotes ≥100 per 10<sup>6</sup> positive cells. Continuous variables p-value estimated using two-sided Mann Whitney U-test (Wilcoxon rank-sum). Categorical variables p-value estimated using two-sided Fisher's exact test.

|                                               | <b>Negative<br/>(N=49)</b> | <b>Positive<br/>(N=15)</b> | <b>P-value</b> |
|-----------------------------------------------|----------------------------|----------------------------|----------------|
| Age – years (mean±SD)                         | 52.3±13.0                  | 53.8±10.0                  | 0.69           |
| Female sex – no. (%)                          | 17(35%)                    | 4 (27%)                    |                |
| Type of Transplant n (%)                      |                            |                            |                |
| Kidney                                        | 18 (37%)                   | 7 (47%)                    | 0.55           |
| Lung                                          | 9 (18%)                    | 4 (27%)                    | 0.48           |
| Liver                                         | 6 (12%)                    | 4 (27%)                    | 0.23           |
| Heart                                         | 5 (10%)                    | 0 (0%)                     | 0.33           |
| Kidney-pancreas                               | 9 (18%)                    | 0 (0%)                     | 0.10           |
| Kidney-liver                                  | 2 (4%)                     | 0 (0%)                     | 1.00           |
| Years since transplant (mean (SD))            | 8.4 (8.5)                  | 6.4 (6.9)                  | 0.41           |
| Immunosuppressant n (%)                       |                            |                            |                |
| Prednisone                                    | 42 (86%)                   | 13 (87%)                   | 1.00           |
| Calcineurin Inhibitor                         | 48(98%)                    | 15 (100%)                  | 1.00           |
| Anti-metabolite                               | 40 (82%)                   | 14 (93%)                   | 0.43           |
| Anti-lymphocyte globulin in the last 3 months | 1 (2%)                     | 0 (0%)                     | 1.00           |
| Number of vaccine doses n (%)                 |                            |                            | 0.79           |
| 0                                             | 2 (4%)                     | 0 (0%)                     |                |
| 1                                             | 1 (2%)                     | 0 (0%)                     |                |
| 2                                             | 7 (14%)                    | 3 (20%)                    |                |
| 3                                             | 36 (73%)                   | 10 (67%)                   |                |
| 4                                             | 3 (6%)                     | 2 (13%)                    |                |

**Supplementary Figure 1** – Figure exemplifying the gating strategy for detecting intracellular cytokines. Arrows indicate the sequence of hierarchical gates. Number in each plot refers to the frequency of the gated subset. CD4<sup>+</sup> and CD8<sup>+</sup> T-cell plots show T-cells stimulated with wild-type or Omicron BA.1 SARS-CoV-2 spike peptides, or negative control.

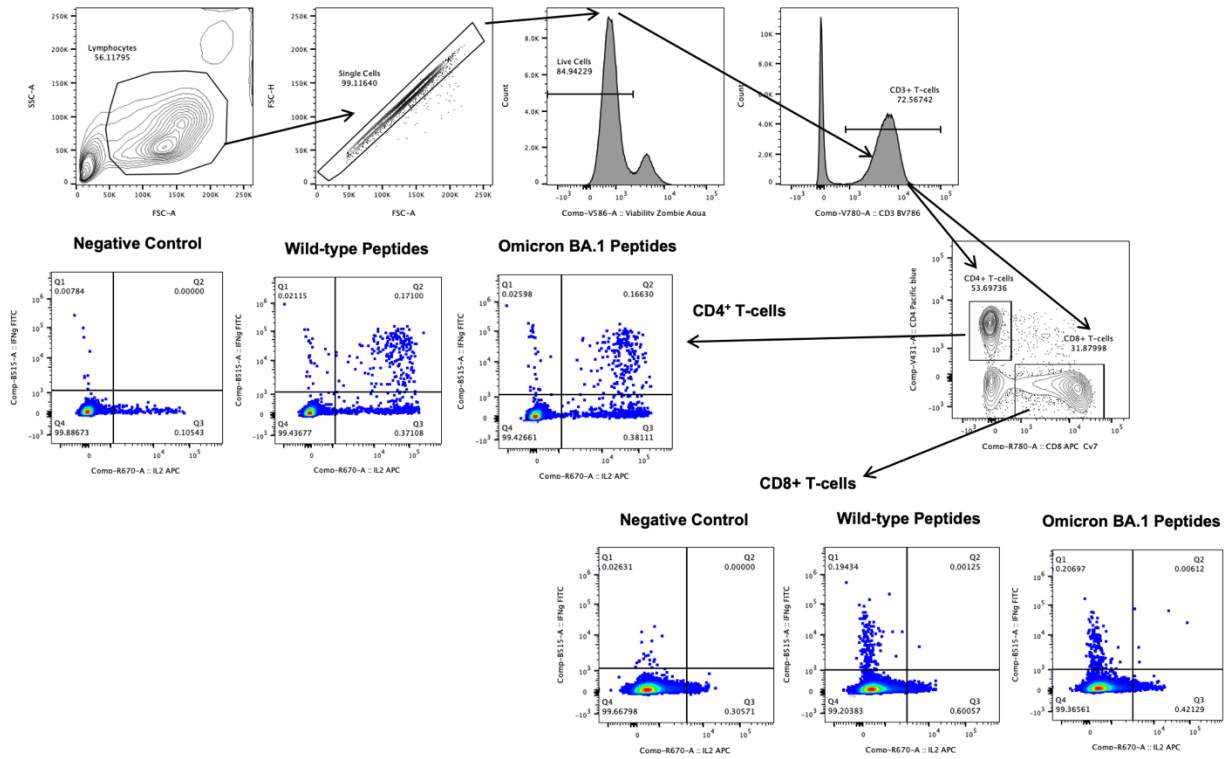

**Supplementary Figure 2** – Anti-nucleocapsid antibody levels in Cohort 3, transplant recipients receiving three doses of mRNA vaccine with no prior history of SARS-CoV-2 infection. Dashed horizontal line shows the threshold for test positivity, according to manufacturer’s instructions ( $\geq 1.4$  U/mL). Each dot represents one patient, n=60. Source data are provided in the Source Data file.

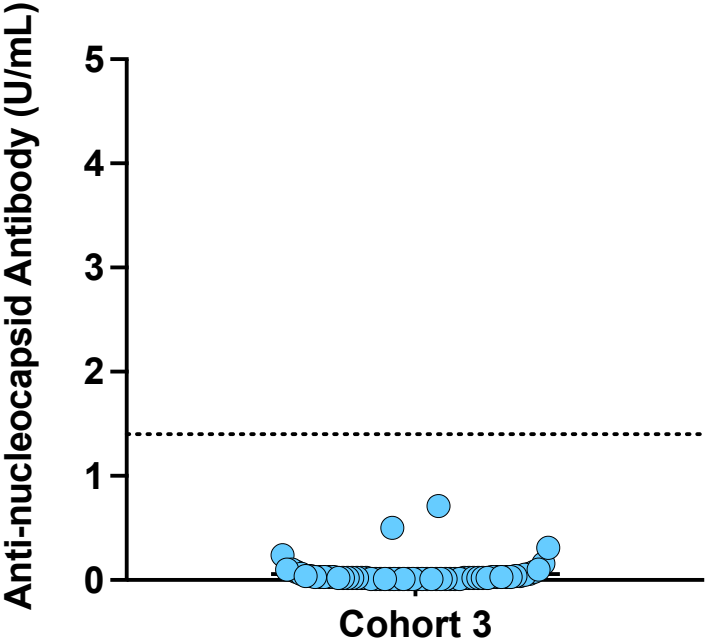

**Supplementary Figure 3** – Two-sided Spearman correlation of BA.1 neutralizing antibody titers ( $\log_{10}$  ID50) with SARS-CoV-2 spike-specific polyfunctional CD4<sup>+</sup> (A) and CD8<sup>+</sup> (B) T-cells frequencies. Source data are provided in the Source Data file.

A

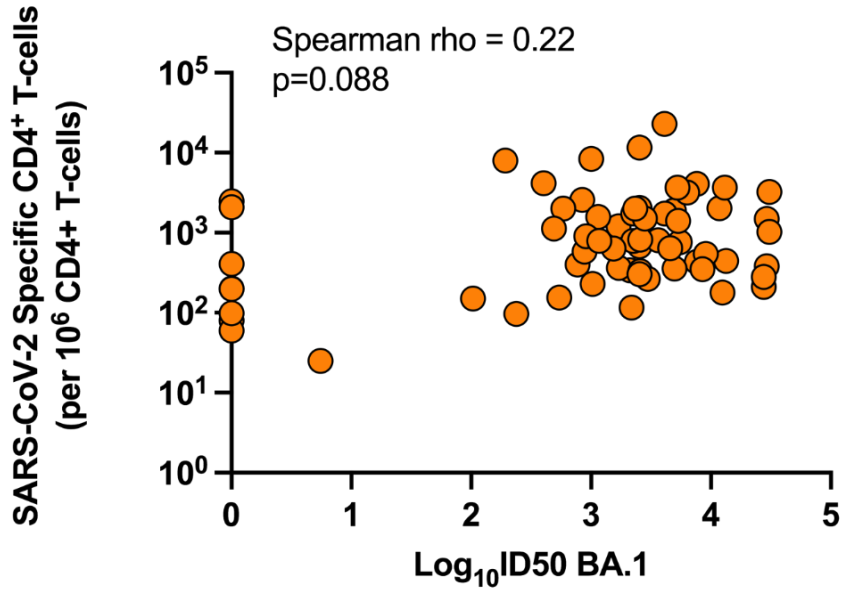

B

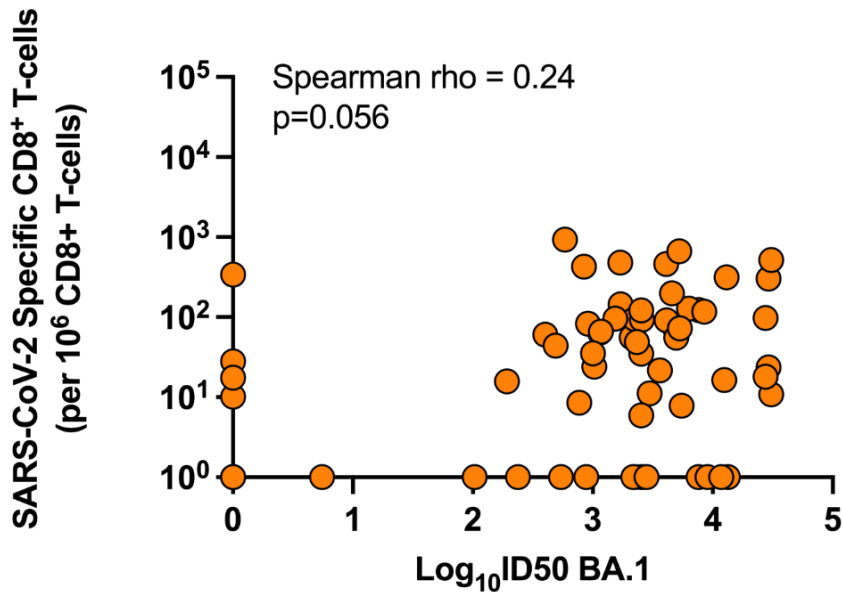

**Supplementary Figure 4** – Correlation of BA.1 and BA.2 neutralizing antibody levels in Cohorts 3 and 4. (A) Correlation between the  $\log_{10}$ ID50 of neutralizing antibody titers against Omicron BA.1 (x-axis) and BA.2 (y-axis) in transplant patients who are triple vaccinated and uninfected (Cohort 3; n=60). Diagonal line denotes line of best-fit by regression; (B) in triple vaccinated immunocompetent health care workers (Cohort 4; n=20). All correlations were performed using a two-sided Spearman test,  $p < 0.001$  for both correlations shown. Source data are provided in the Source Data file.

A

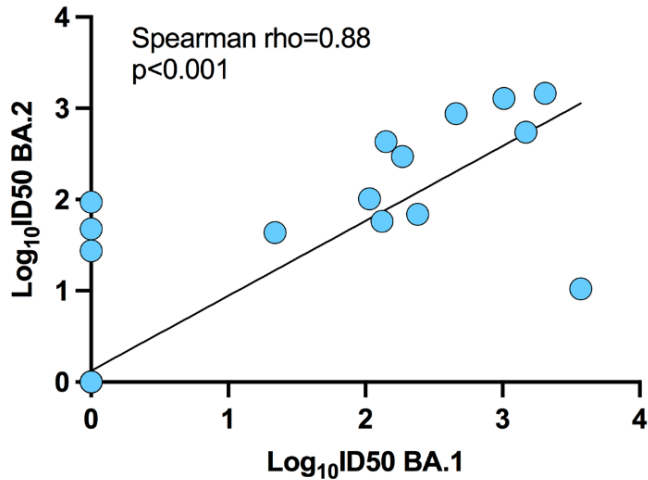

B

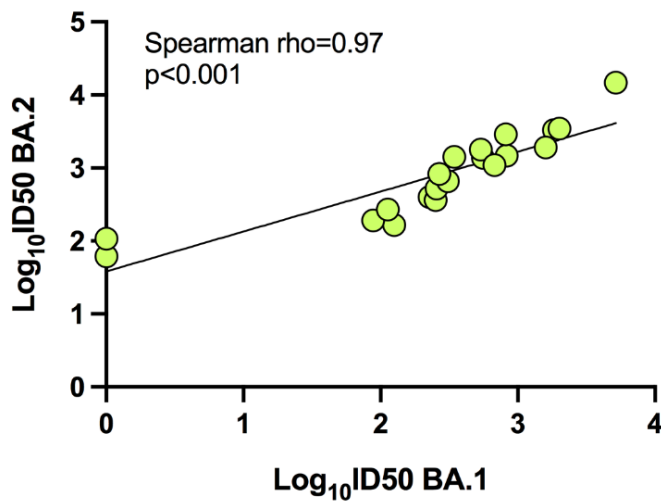

Supplement: 41467_2022_32235_MOESM1_ESM.pdf [file 41467_2022_32235_MOESM1_ESM.pdf]
